# Supplementary material for: The therapeutic potential of neurofibromin signaling pathways and binding partners
Source: PubMed Central journal article supplement (PMC10119308; doi:10.1038/s42003-023-04815-0), 2023-04-20
Supplement: 42003_2023_4815_MOESM1_ESM.pdf [file 42003_2023_4815_MOESM1_ESM.pdf]

**Supplementary Table 1.** Neurofibromin key residues involved in protein structure and protein-protein associations.

| Domain             | Residue         | Binding partner | Mutation | Effect in protein                                           | Ref      |
|--------------------|-----------------|-----------------|----------|-------------------------------------------------------------|----------|
| N-terminal region  | 103             | PKC             | R>K      | Nd                                                          | 49       |
|                    | 105             | PKC             | D>N      | Nd                                                          | 49       |
|                    | 108             | PKC             | M>I      | Nd                                                          | 49       |
|                    | 114             | PKC             | L>M      | Nd                                                          | 49       |
|                    | 116             | PKC             | E>*      | Truncated protein → loss of functional GRD and CSRD domains | 49       |
|                    | 131             | PKC             | A>S      | Nd                                                          | 49       |
|                    | 225             | PKC             | E>Rfs/6  | Truncated protein → non functional                          | 49       |
| Interdomain region | 304             | PKC             | R>*      | Improper functioning of PKC phosphorylation                 | 84       |
|                    | 315             |                 | Q>Q      |                                                             | 84       |
|                    | 316             |                 | L>M      |                                                             | 84       |
|                    | 335             |                 | N>N      |                                                             | 84       |
| CSRD               | 777             | Ras             | W>R      | Reduction of RasGAP activity                                | 48       |
|                    | 844-848         | DDAH1           | Missense | Severe phenotypes                                           | 36       |
| Interdomain region | 991             | Nd              | MΔ       | Reduction of protein stability                              | 36       |
|                    | 1084            | Nd              | P>R      |                                                             | 36       |
| TBD                | 1095-1097 (KYF) | Nd              | Nd       | Degradation                                                 | 48       |
|                    | 1098-1100 (TLF) | Nd              | Nd       |                                                             | 48       |
| GRD                | 1276            | Ras             | R>E      | Reduction of RasGAP activity                                | 48       |
|                    | 1423            |                 | K>E      |                                                             | 48       |
| PH                 | 1719-1736       | 5-HT6           | Δ        | Defects in 5-HT6 activity                                   | 82       |
|                    | 1746-1750       |                 | Δ        |                                                             | 82       |
|                    | 1748            |                 | R>A      |                                                             | 82       |
|                    | 1750            |                 | K>A, Δ   |                                                             | 82       |
|                    | 1809            | Ras             | R>G      | Reduction of RasGAP activity                                | 48       |
| HLR                | 1825-2428       | Nd              | Nd       | Lower risk of OPG                                           | 52       |
|                    | 1834            | NF1             | L>R      | Dimerization                                                | 38       |
|                    | 2104            |                 | L>R      |                                                             | 48       |
|                    | 1849            | Nd              | R>Q      | Dimerization<br>Reduction of protein stability              | 48<br>48 |
| Interdomain region | 1869            | Ras             | G>S      | Reduction of RasGAP activity                                | 48       |
|                    | 2067            |                 | L>P      | Reduction of RasGAP activity and protein stability          | 48       |
| CTD                | T2554           | 14-3-3          | S/T> A   | Significantly decreased binding activity with 14-3-3        | 55       |
|                    | S2576           |                 |          |                                                             | 55       |
|                    | S2578           |                 |          |                                                             | 55       |
|                    | S2580           |                 |          |                                                             | 55       |
|                    | S2813           |                 |          |                                                             | 55       |

**Supplementary Table 2.** Neurofibromin posttranslational modifications.

| Domain            | Residue       | Modification    | Protein                     | Effect in neurofibromin                                                   | Ref       |
|-------------------|---------------|-----------------|-----------------------------|---------------------------------------------------------------------------|-----------|
| N-Terminal region | Nd            | Phosphorylation | PKC $\alpha$                | Proteasomal degradation                                                   | 104       |
|                   |               |                 | Hyperactivated PKC $\alpha$ | Destabilization, role in sporadic tumorigenesis                           | 104       |
|                   | Nd            |                 | PKC $\beta$                 | Nd                                                                        | 105       |
|                   | Nd            |                 | PKC $\epsilon$              | Recruitment to lipid rafts<br>Increase of RasGAP activity                 | 50,<br>51 |
|                   | Nd            |                 | PKC $\zeta$                 | Nd                                                                        | 22        |
| CSRD              | T586          | Phosphorylation | PKA $\alpha$                | Allosteric activation of GRD domain                                       | 54        |
|                   | S818          |                 |                             |                                                                           | 54        |
|                   | S876          |                 |                             |                                                                           | 54        |
|                   | C622/C632     | Palmitoylation  | Nd                          | Presumably stabilization of tridimensional structure                      | 51        |
|                   | C673/680      |                 |                             |                                                                           | 51        |
|                   | C714/721      |                 |                             |                                                                           | 51        |
|                   | C845          |                 |                             |                                                                           | Nd        |
| TBD               | 1095-1097 KYF | Ubiquitination  | Nd                          | Degradation of the protein                                                | 59        |
|                   | 1098-1100 TLF |                 | Nd                          |                                                                           | 59        |
| GRD               | 1176-1552     | Ubiquitination  | FAF2 (ETEA)                 | Ub-dependent proteolysis                                                  | 72        |
|                   | C1365         | Palmitoylation  | Nd                          | Weaker RasGAP activity in GRD nf1 type II                                 | 51        |
| SEC14-PH          | K1634         | SUMOylation     |                             | Role in Ras-GAP activity                                                  | 83        |
|                   | K1731         |                 |                             |                                                                           | 83        |
| CTD               | T2554         | Phosphorylation | PKA                         | Association with 14-3-3, leading to a negative regulation of GAP activity | 55        |
|                   | Y2556         |                 | CK2                         |                                                                           | 55        |
|                   | S2576         |                 | PKA                         |                                                                           | 55        |
|                   | S2578         |                 |                             |                                                                           | 55        |
|                   | S2580         |                 |                             |                                                                           | 55        |
|                   | S2813         |                 |                             |                                                                           | 55        |
|                   | Nd            | Ubiquitination  | HAF                         | Proteasomal degradation during hypoxia                                    | 149       |
| Nd                | Nd            | Ubiquitination  | Cul3 E3 ligase              | Proteasomal degradation                                                   | 149       |
